# Supplementary material
Source: PubMed Central journal article supplement (PMC4119042)

# RT Window length ( n=7535 )

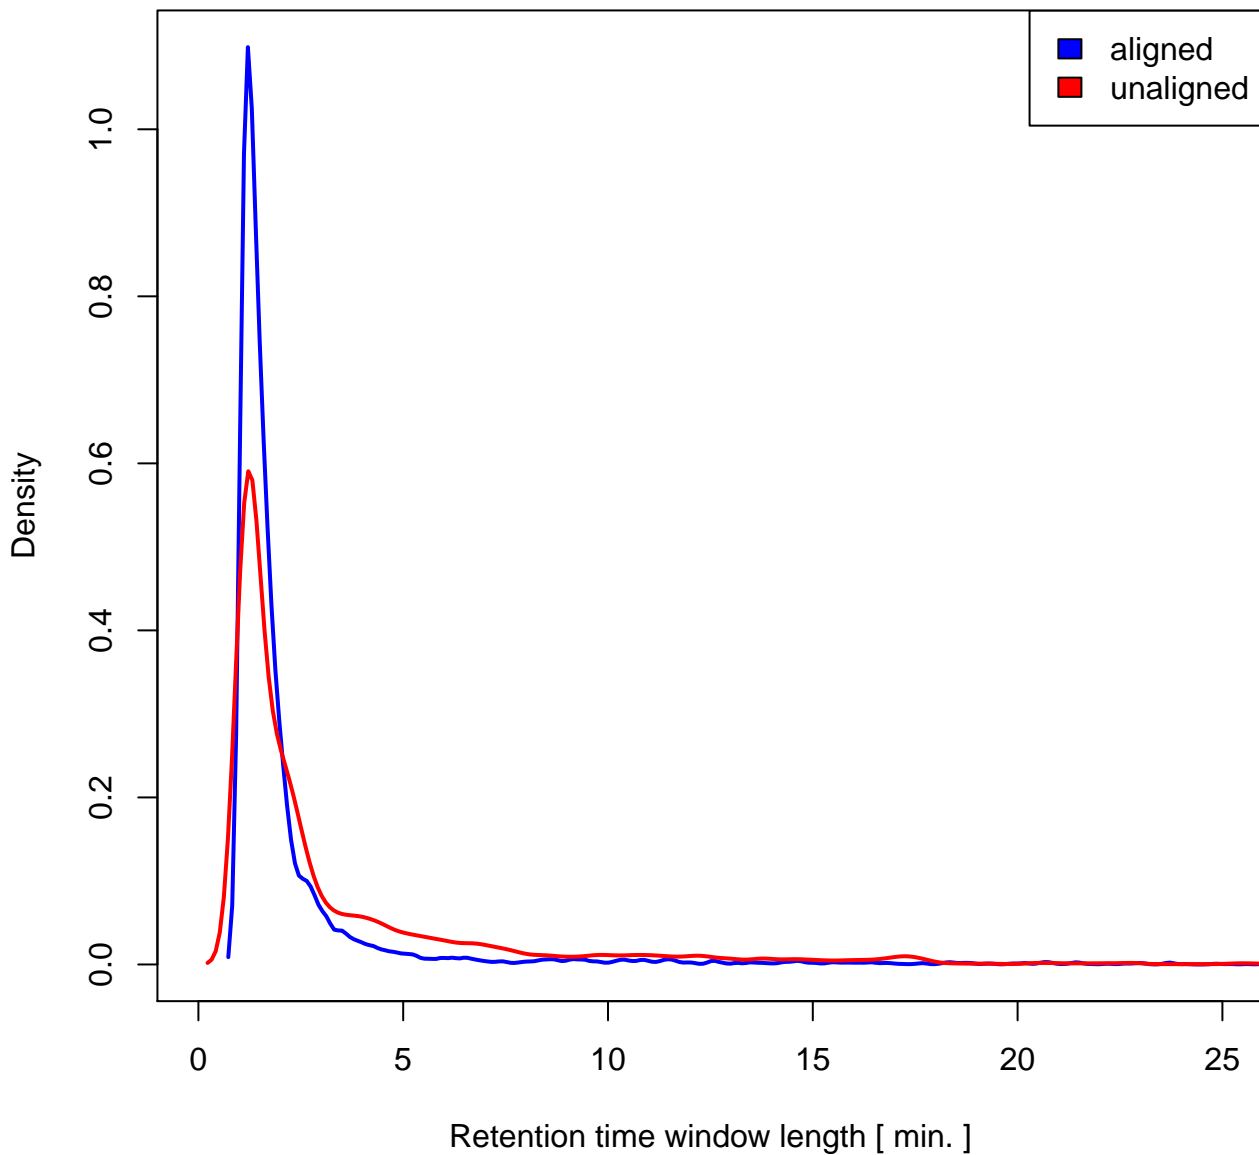

# RT Window length ( n=7535 )

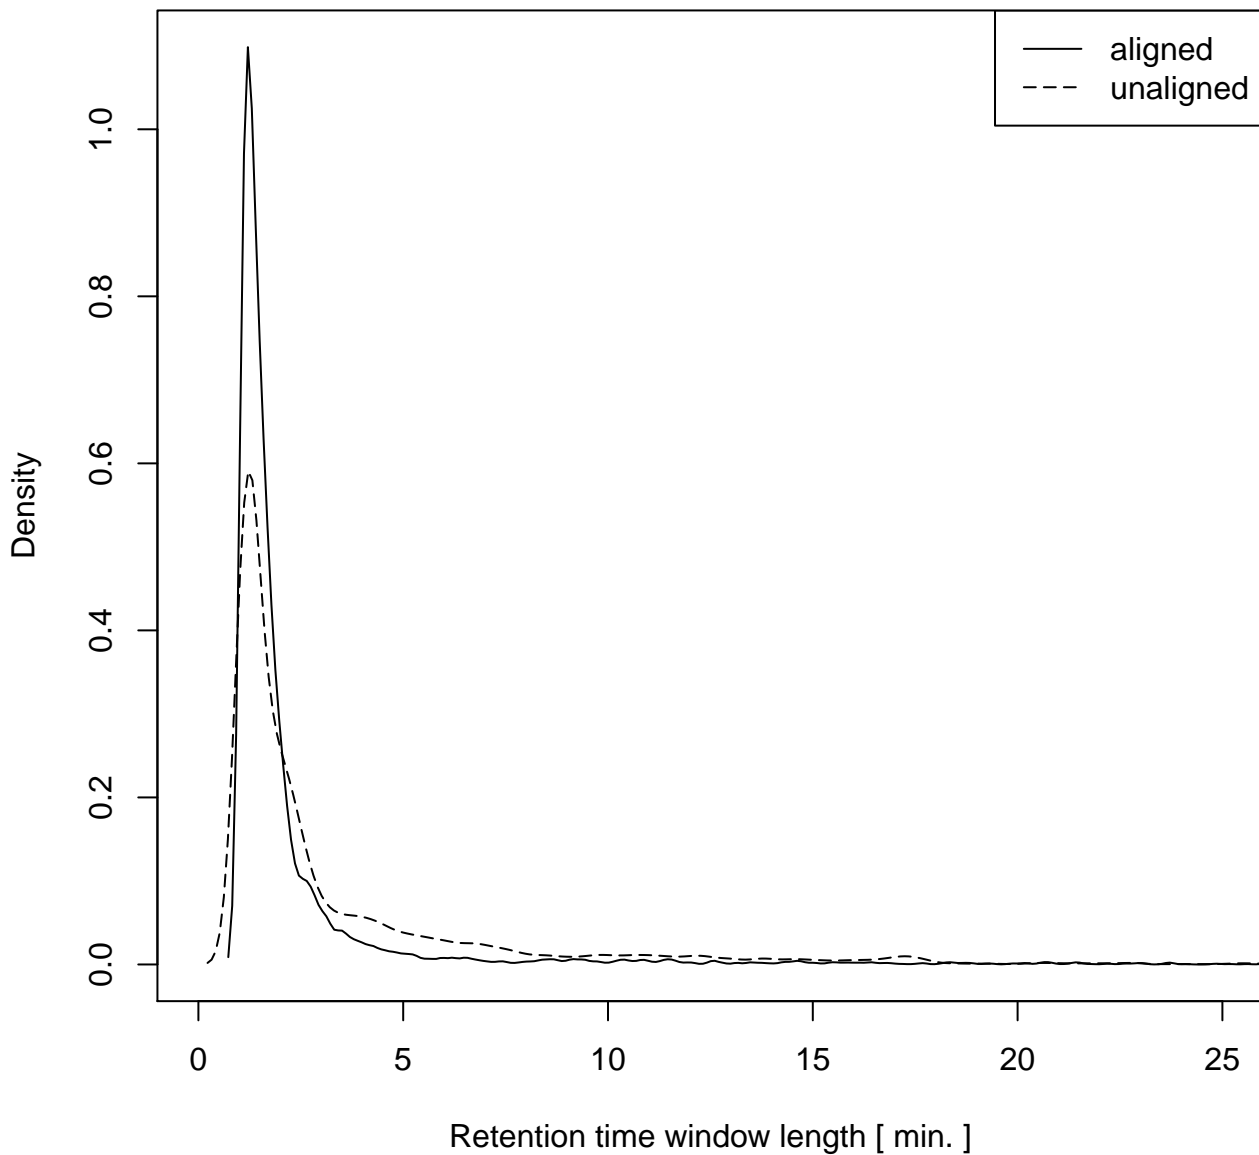

Supplement: supp_pp.114.240648_240648revFigS10.pdf [file supp_pp.114.240648_240648revFigS10.pdf]
